# Supplementary material for: Impact of Coarse-Mode Aerosol on Jiangxi Warm Clouds Considering Different Updraft and Activation Intensities: An SBM-FAST Approach
Source: Copernicus journal article supplement (doi:10.5194/egusphere-2024-1592), 2024-07-23
Supplement: Supplementary file 1 [file egusphere-2024-1592-supplement.pdf]

# Supporting Information for [Impact of Coarse-Mode Aerosol on Jiangxi Warm Clouds Considering Different Updraft and Activation Intensities: An SBM- FAST Approach]

5 Yi Li<sup>1,2</sup>, Xiaoli Liu<sup>1,2\*</sup>

<sup>1</sup> China Meteorological Administration Aerosol-Cloud and Precipitation Key Laboratory, Nanjing University of Information Science and Technology, Nanjing 210044, China.

<sup>2</sup> College of Atmospheric Physics, Nanjing University of Information Science and Technology, Nanjing 210044, China.

Correspondence to: Xiaoli Liu ([liuxiaoli2004y@nuist.edu.cn](mailto:liuxiaoli2004y@nuist.edu.cn))

## 10 Supplement

### 1 Cloud-Rain Auto-conversion Threshold Function

The Cloud-Rain Auto-conversion Threshold Function (T) is an important parameter that measures the automatic conversion of cloud to rain. Its numerical value indirectly indicates the strength of the collision-coalescence process in the cloud (Liu et al., 2005, 2006).

15

$$T = \frac{P}{P_0} = \frac{\left[ \int_{r_c}^{\infty} r^6 n(r) dr \right]}{\left[ \int_0^{\infty} r^6 n(r) dr \right]} \left[ \frac{\int_{r_c}^{\infty} r^3 n(r) dr}{\int_0^{\infty} r^3 n(r) dr} \right] \quad (S1)$$

$$r_c \approx 4.09 \times 10^{-4} \beta_{con}^{1/6} \frac{N_c^{1/6}}{C_{LW}^{1/3}} \quad (S2)$$

20

In this context,  $n(r)$  represents the cloud droplet spectrum, where  $r$  is the cloud droplet radius,  $r_c$  is the critical radius of the auto-conversion function, and  $\beta_{con} = 1.15 \times 10^{23}$ . The value of  $T$  ranges from 0 to 1, where  $T = 0$  indicates no collision-coalescence process, and  $T = 1$  indicates complete occurrence of the collision-coalescence process. A higher value of  $T$  indicates a higher probability of collision-coalescence occurring.

### 2 Calculation of cloud droplet spectrum parameters

The average cloud droplet diameter ( $R_m$ ), cloud droplet volume-weighted radius ( $R_v$ ), standard deviation ( $\sigma_c$ ) and cloud droplet spectral relative dispersion ( $\varepsilon$ ) were calculated as follow:

$$R_m = \frac{1}{N} \sum_{i=1}^k r_i n_i \quad (S3)$$

25

$$r_v = \left( \frac{1}{N} \sum_{i=1}^k r_i^3 n_i \right)^{\frac{1}{3}} \quad (S4)$$

$$\sigma_c = \left( \frac{1}{N} \sum_{i=1}^k (r_i - R_m)^2 n_i \right)^{\frac{1}{2}} \quad (S5)$$

$$\varepsilon = \frac{\sigma_c}{R_m} \quad (S6)$$

30  $n_i$  represents the number concentration of cloud droplets in each size bin (unit:  $\text{cm}^{-3}$ ),  $N$  is the total number concentration of cloud droplets (unit:  $\text{cm}^{-3}$ ),  $r_i$  denotes the particle radius of cloud droplets in each size bin (unit:  $\mu\text{m}$ ),  $r_v$  is the volume-weighted mean radius of cloud droplets (unit:  $\mu\text{m}$ ),  $\sigma_c$  is the standard deviation of the cloud droplet spectrum (unit:  $\mu\text{m}$ ), and  $\varepsilon$  represents the cloud droplet spectral relative dispersion (dimensionless).

### 3 Cloud Droplet Activation Intensity

Lu et al. (2020) introduced the variable FBS (First Bin Strength), which represents the Cloud Droplet Activation Intensity.

$$FBS = \frac{n_1}{n_c} \quad (S7)$$

35  $n_1$  represents the number concentration of the first bin in the cloud droplet spectrum, measured in  $\text{cm}^{-3}$ . When the value of FBS is larger, it indicates a higher probability of the peak of the cloud droplet spectrum occurring in the first bin, which means there are more small droplets in the cloud. This suggests a stronger influence of aerosol activation or small droplet deactivation.

40
